# Supplementary material
Source: Copernicus journal article supplement (doi:10.5194/mr-2026-7)
Supplement: Supplementary file 1 [file mr-2026-7-supplement.pdf]

# Supporting Information

## Optimally controlled NMR in electrochemistry: Larmor and nutation frequency selective spin excitation for locally selective NMR experiments

Johannes F. Kochs<sup>1,2,\*</sup>, Armin J. Römer<sup>1,2,\*</sup>, Michael Schatz<sup>1</sup>, Matthias Streun<sup>3</sup>, Sven Jovanovic<sup>1</sup>, Rüdiger-A. Eichel<sup>1,4,5</sup>, Simone S. Köcher<sup>1,6</sup>, and Josef Granwehr<sup>1,2</sup>

<sup>1</sup>Forschungszentrum Jülich GmbH, Institute of Energy Technologies, Fundamental Electrochemistry (IET-1), Jülich, Germany

<sup>2</sup>Institute of Technical and Macromolecular Chemistry, RWTH Aachen University, Aachen, Germany

<sup>3</sup>Forschungszentrum Jülich GmbH, Institute of Technology and Engineering (ITE), Jülich, Germany

<sup>4</sup>Institute of Physical Chemistry, RWTH Aachen University, Aachen, Germany

<sup>5</sup>Faculty of Mechanical Engineering, RWTH Aachen University, Aachen, Germany

<sup>6</sup>Fritz Haber Institute of the Max Planck Society, Berlin, Germany

**Correspondence:** Simone S. Köcher (s.koecher@fz-juelich.de)

### Contents

|           |                                                                                                 |           |
|-----------|-------------------------------------------------------------------------------------------------|-----------|
| <b>1</b>  | <b>Pulse shapes of QOC pulses</b>                                                               | <b>2</b>  |
| 1.1       | Larmor-frequency selective pulses . . . . .                                                     | 2         |
| 1.2       | $B_1$ -selective pulses . . . . .                                                               | 5         |
| <b>5</b>  | <b>2 Excitation Profiles</b>                                                                    | <b>11</b> |
| 2.1       | Larmor-frequency selective pulses . . . . .                                                     | 11        |
| 2.2       | Nutation-frequency selective pulses . . . . .                                                   | 13        |
| <b>3</b>  | <b>Experimental Setup</b>                                                                       | <b>16</b> |
| 3.1       | Setup in FEM simulation . . . . .                                                               | 16        |
| <b>10</b> | <b>4 Supporting measurements</b>                                                                | <b>17</b> |
| 4.1       | Nutation experiments . . . . .                                                                  | 17        |
| 4.2       | $B_1$ -selective QOC pulse performance . . . . .                                                | 18        |
| 4.3       | $B_0$ -selective QOC pulses . . . . .                                                           | 23        |
| <b>5</b>  | <b>Supporting data</b>                                                                          | <b>24</b> |
| <b>15</b> | <b>5.1 Individual relative integrals of the <math>B_0</math>-selective QOC pulses . . . . .</b> | <b>24</b> |

## 1 Pulse shapes of QOC pulses

### 1.1 Larmor-frequency selective pulses

#### 1.1.1 $B_1$ -robust selective excitation within $\pm 500$ Hz in a $\pm 2000$ Hz suppression band

Figure S1 shows amplitude and phase of the pulse used for  $B_1$ -robust, selective excitation within  $\pm 500$  Hz in a  $\pm 2000$  Hz suppression band presented in Sec. 3.1 (Fig. 3) of the main article.

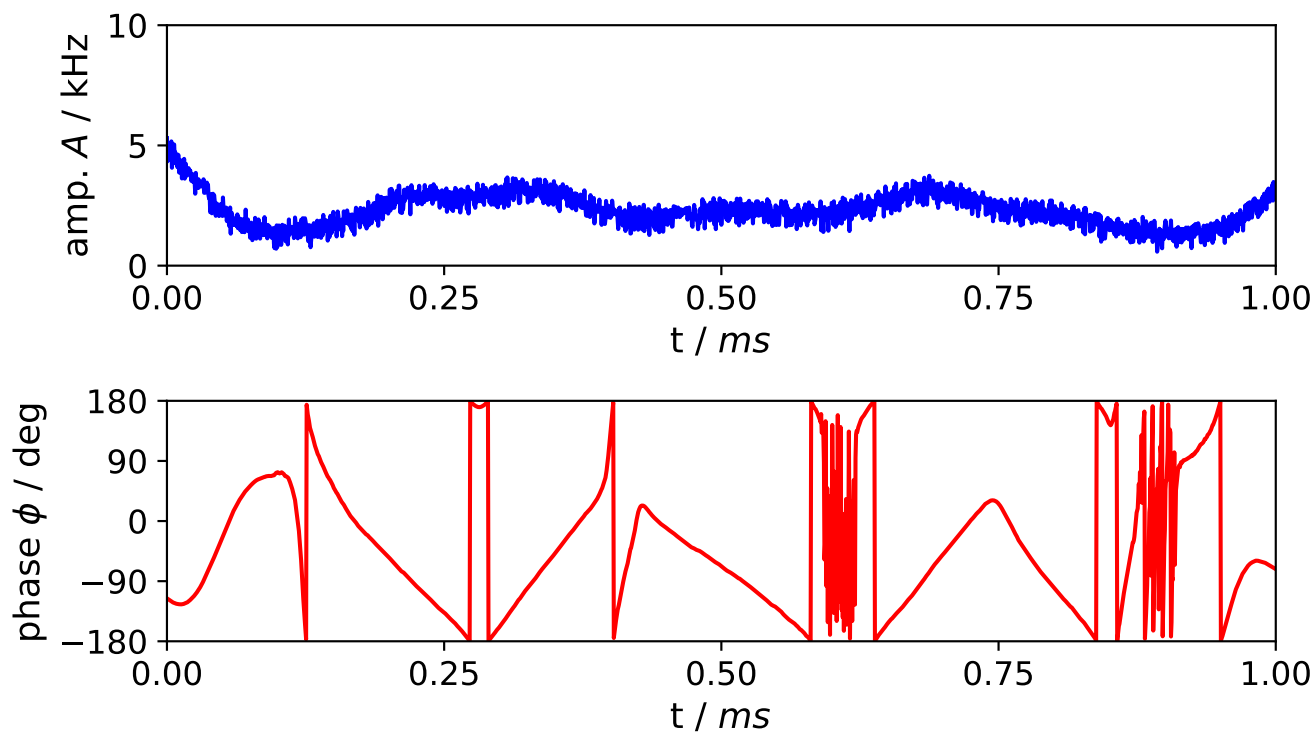

**Figure S1.** Pulse amplitude  $A$  and phase  $\phi$  of the 1 ms Larmor-frequency selective excitation pulse.

### 1.1.2 $B_1$ -robust selective suppression within $\pm 500$ Hz in a $\pm 2000$ Hz excitation band

Figure S2 and S3 below show amplitude and phase of the pulses used for  $B_1$ -robust, selective suppression within  $\pm 500$  Hz in a  $\pm 2000$  Hz excitation band presented in Sec. 3.1 of the main article. The experimental results in Sec. 3.1, Fig. 4 were obtained with the pulse in Fig. S3.

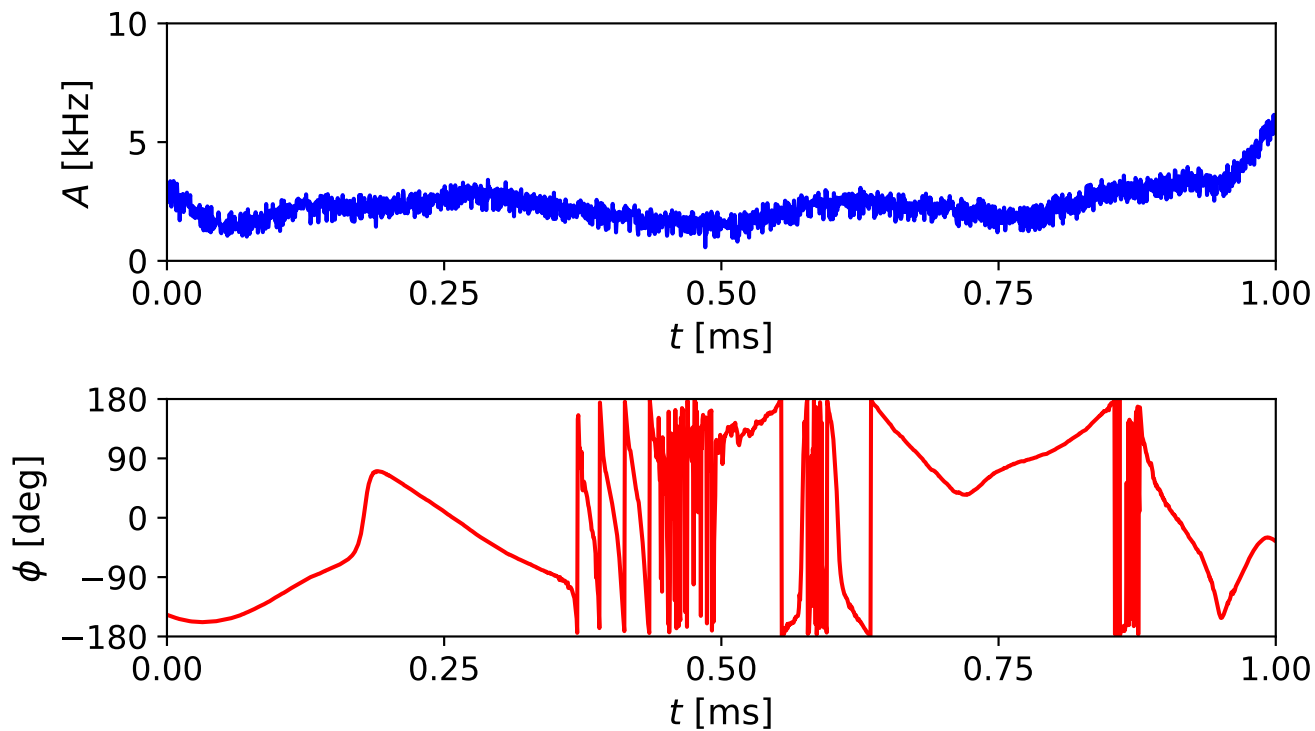

**Figure S2.** Pulse amplitude  $A$  and phase  $\phi$  of the 1 ms Larmor-frequency selective suppression pulse.

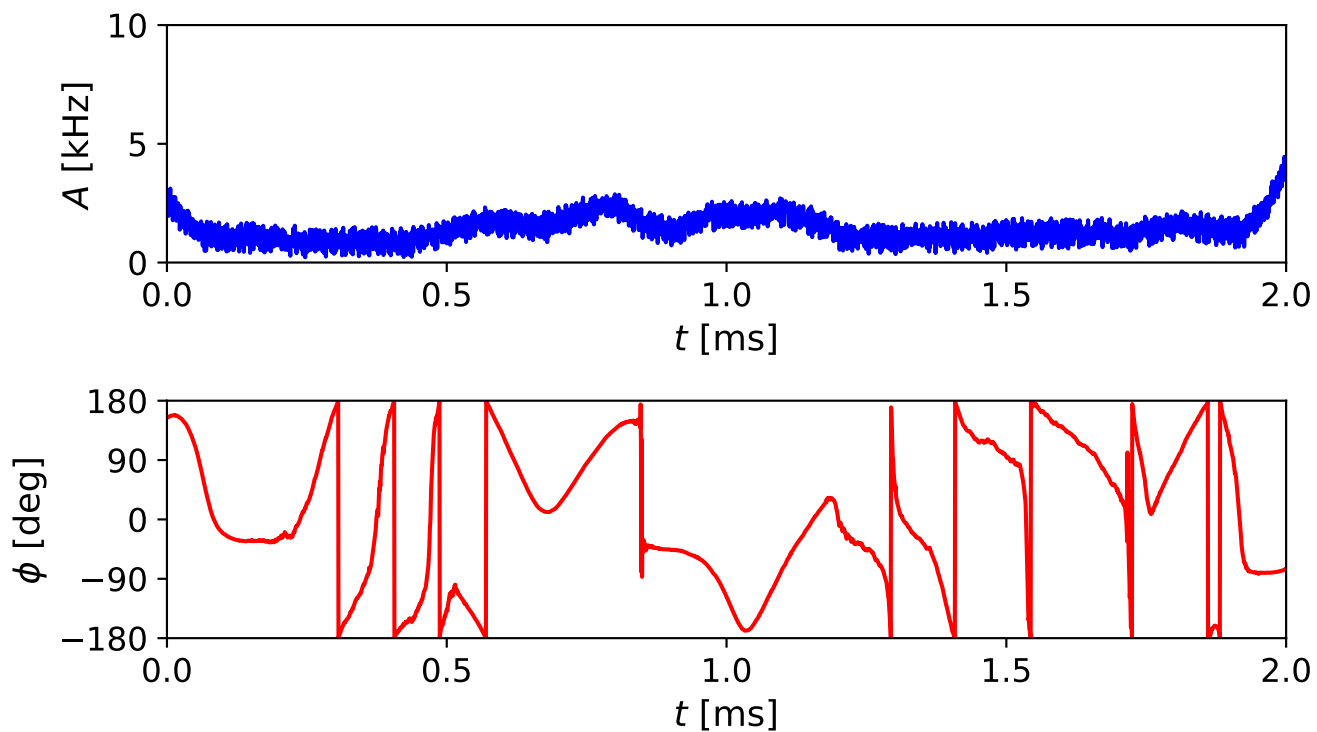

**Figure S3.** Pulse amplitude  $A$  and phase  $\phi$  of the 2 ms Larmor-frequency selective suppression pulse.

The following Figures S4 to S9 show amplitude and phase of the pulses used for Larmor frequency-robust,  $B_1$ -selective excitation for various artificial nutation frequency increases presented in Sec. 3.2 (Fig. 6) of the main article.

### 1.2.1 Larmor frequency-robust selective excitation for 0 % artificial nutation frequency increase

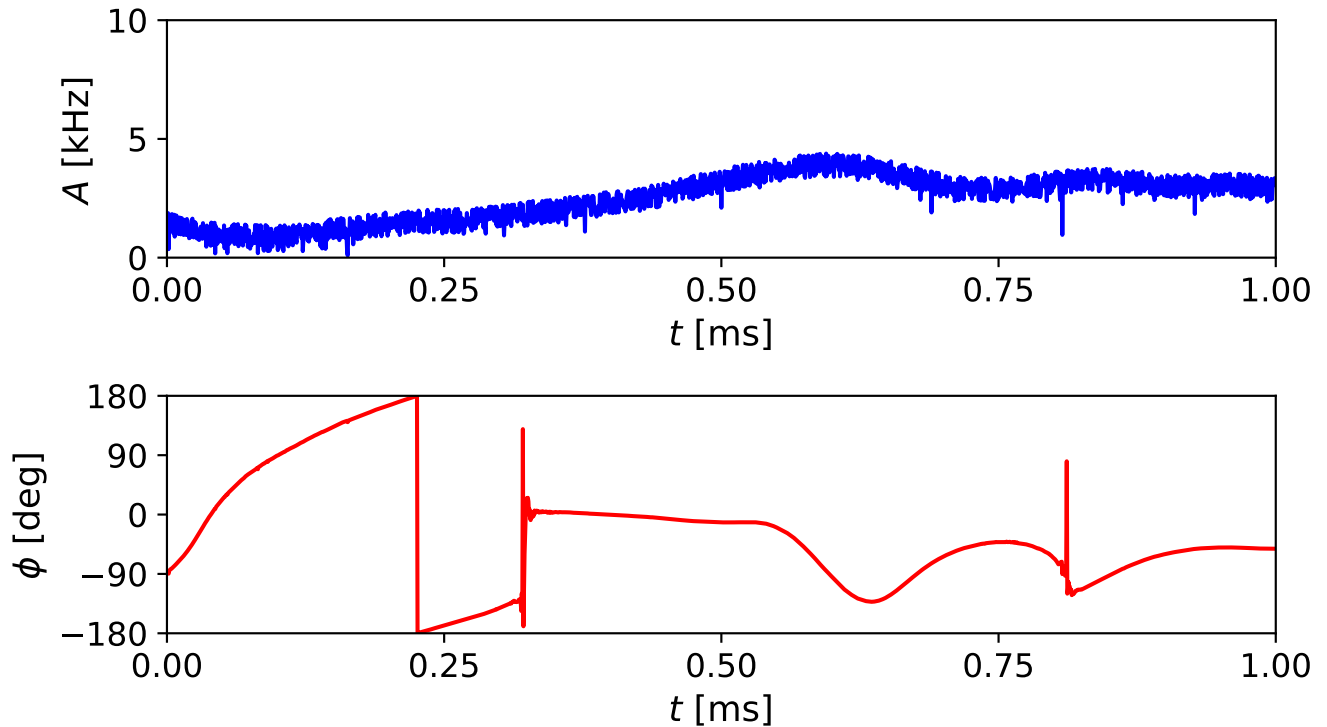

**Figure S4.** Pulse amplitude  $A$  and phase  $\phi$  of nutation-frequency selective excitation for no  $B_1$  increase.

### 1.2.2 Larmor frequency-robust selective excitation for 20 % artificial nutation frequency increase

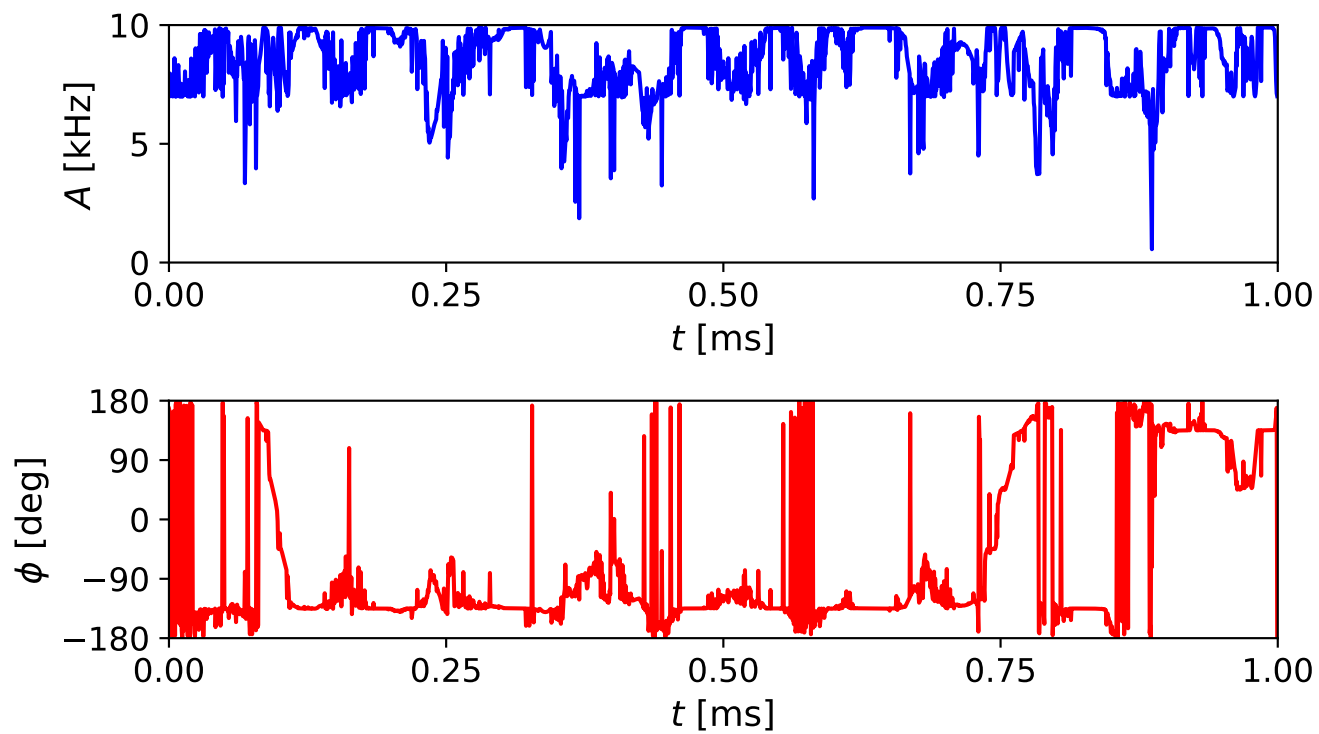

**Figure S5.** Pulse amplitude  $A$  and phase  $\phi$  of nutation-frequency selective excitation for 20 %  $B_1$  increase.

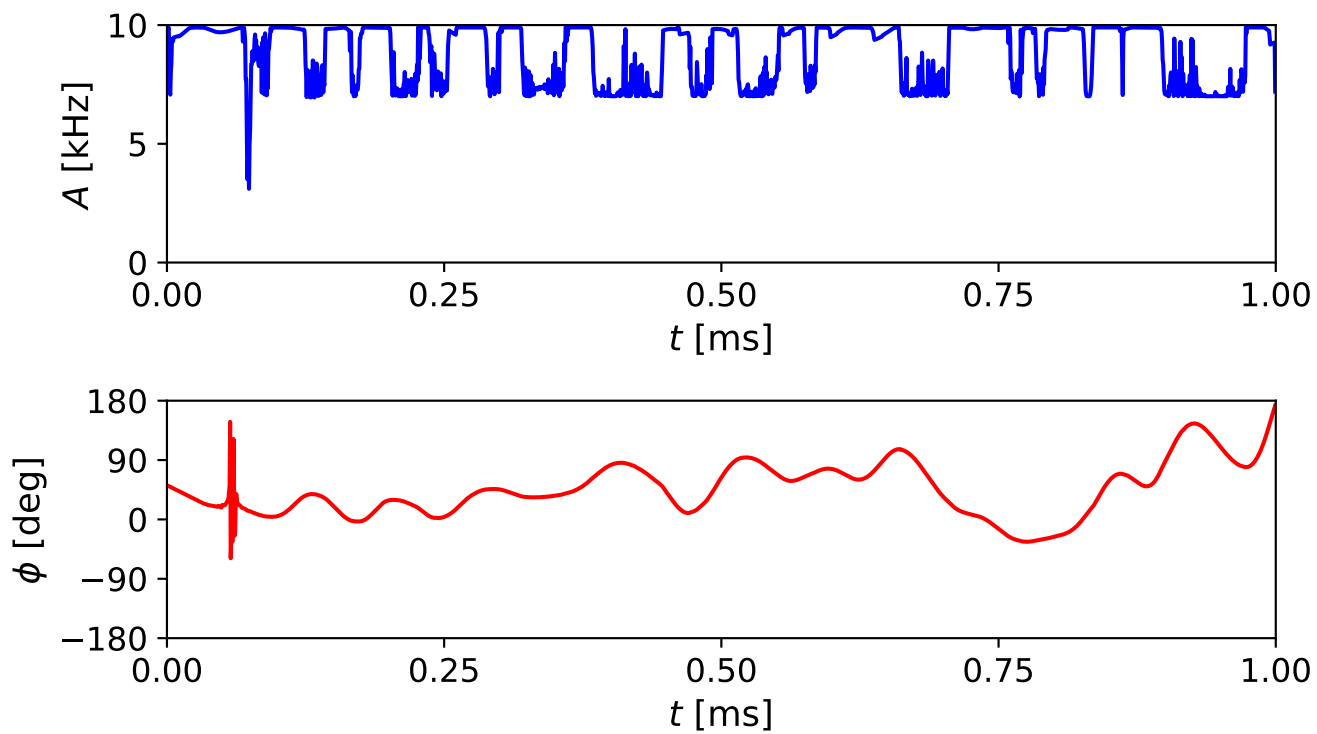

**Figure S6.** Pulse amplitude  $A$  and phase  $\phi$  of nutation-frequency selective excitation for 25 %  $B_1$  increase.

### 1.2.4 Larmor frequency-robust selective excitation for 30 % artificial nutation frequency increase

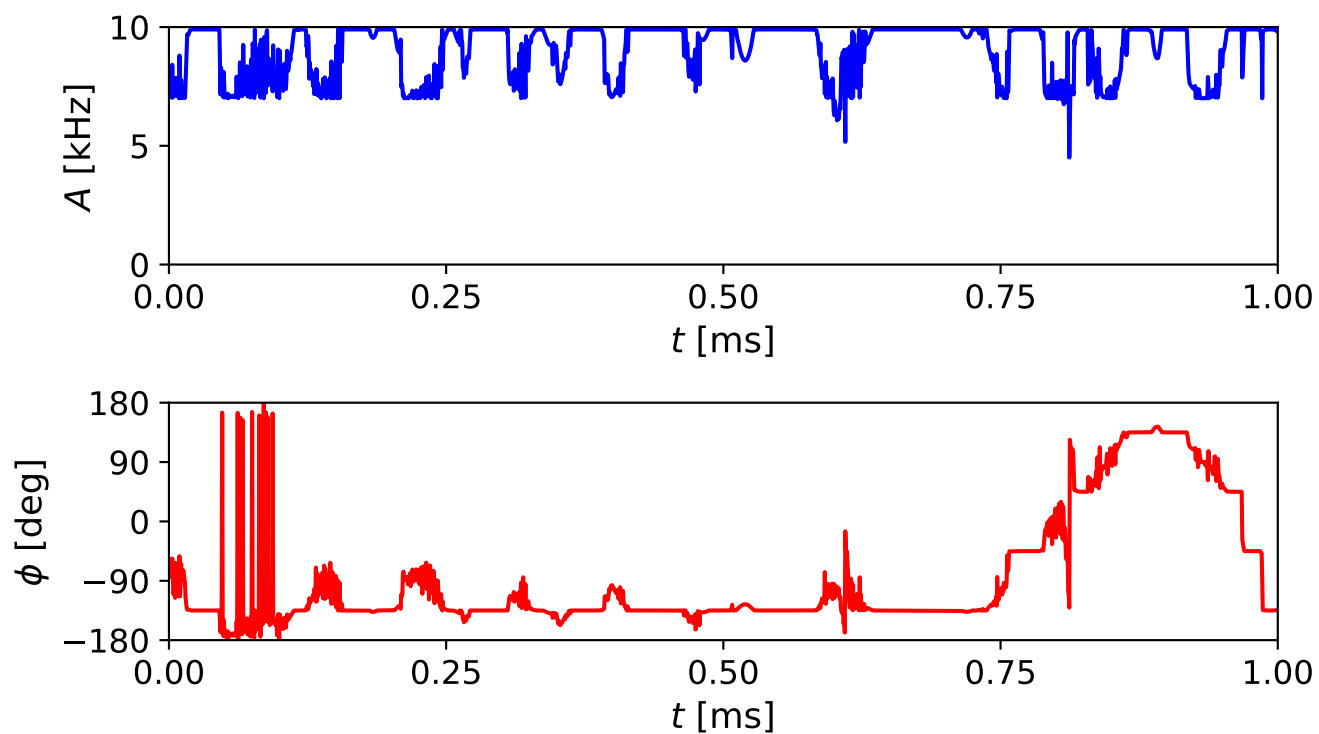

**Figure S7.** Pulse amplitude  $A$  and phase  $\phi$  of nutation-frequency selective excitation for 30 %  $B_1$  increase.

### 1.2.5 Larmor frequency-robust selective excitation for 40 % artificial nutation frequency increase

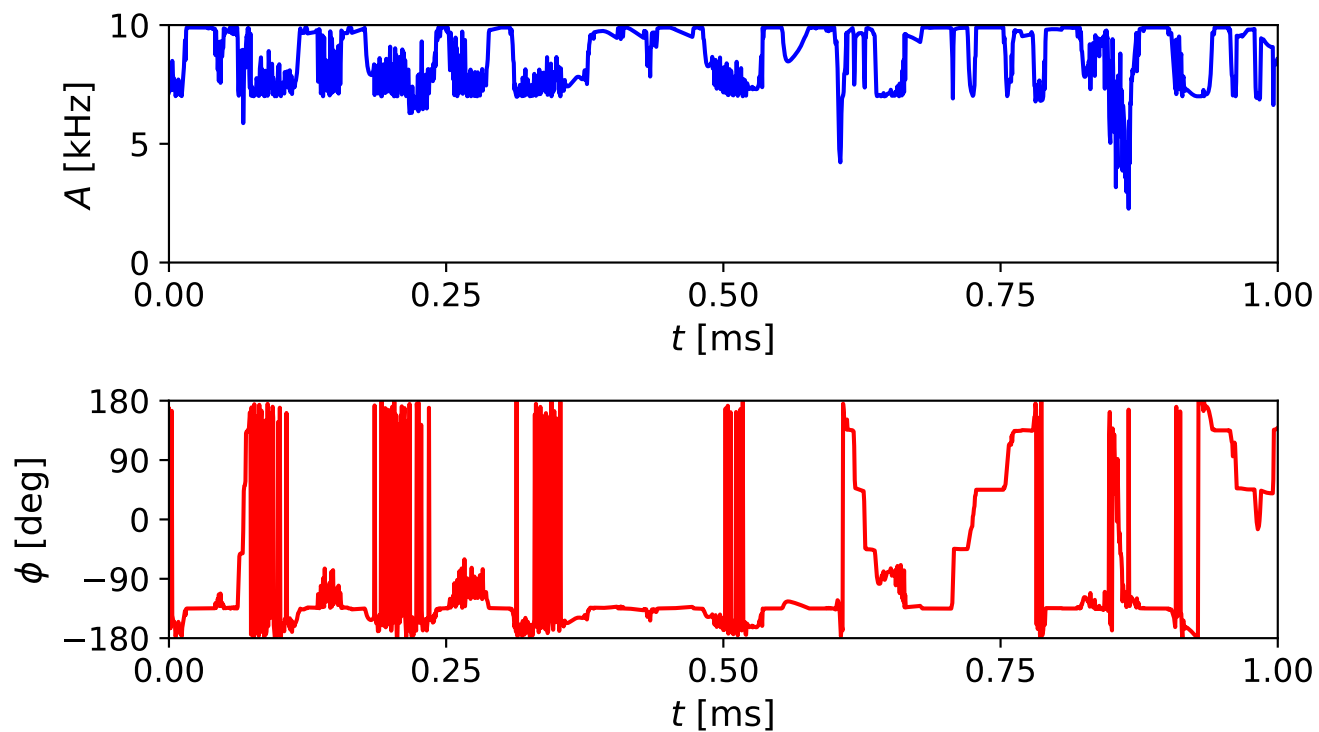

**Figure S8.** Pulse amplitude  $A$  and phase  $\phi$  of nutation-frequency selective excitation for 40 %  $B_1$  increase.

### 1.2.6 Larmor frequency-robust selective excitation for 80 % artificial nutation frequency increase

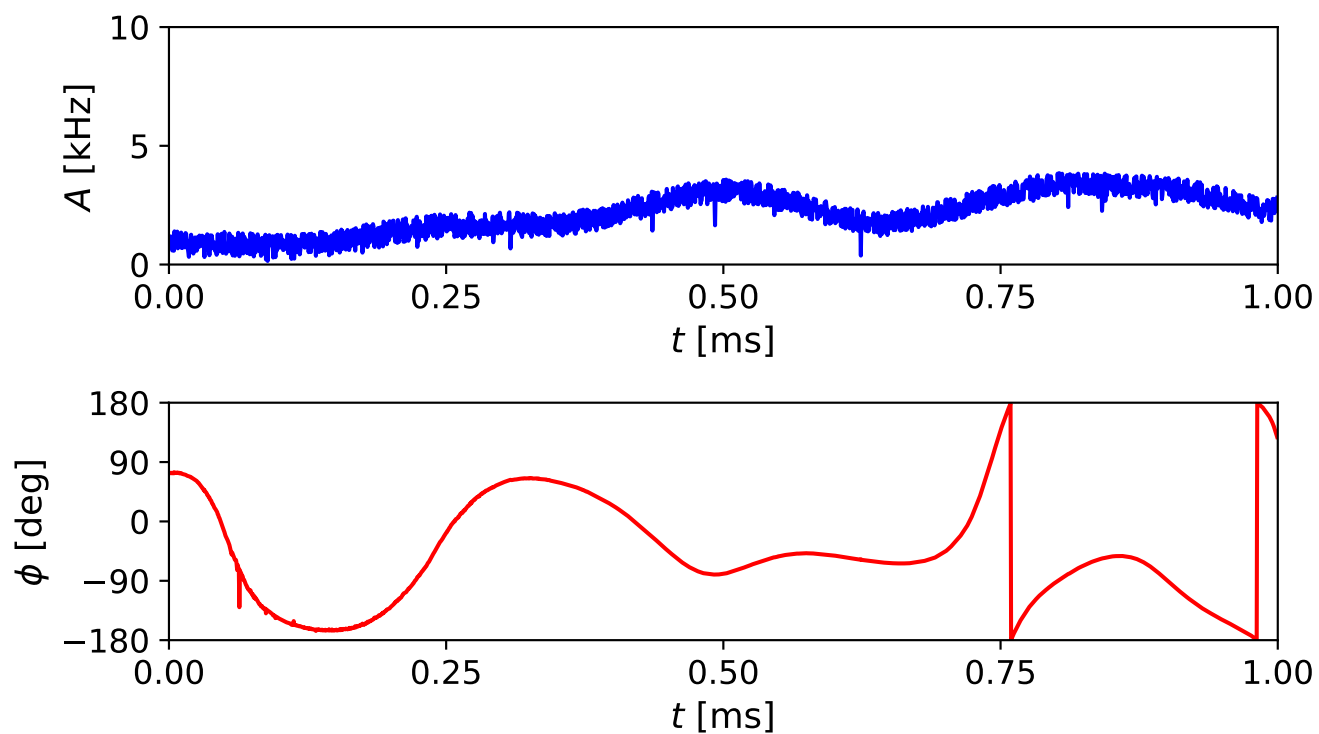

**Figure S9.** Pulse amplitude  $A$  and phase  $\phi$  of nutation-frequency selective excitation for 80 %  $B_1$  increase.

## 2 Excitation Profiles

### 35 2.1 Larmor-frequency selective pulses

#### 2.1.1 $B_1$ -robust selective excitation within $\pm 500$ Hz in a $\pm 2000$ Hz suppression band

Figure S10 shows the excitation profile of the pulse used for  $B_1$ -robust, selective excitation within  $\pm 500$  Hz in a  $\pm 2000$  Hz suppression band presented in Sec. 3.1 (Fig. 3) of the main article.

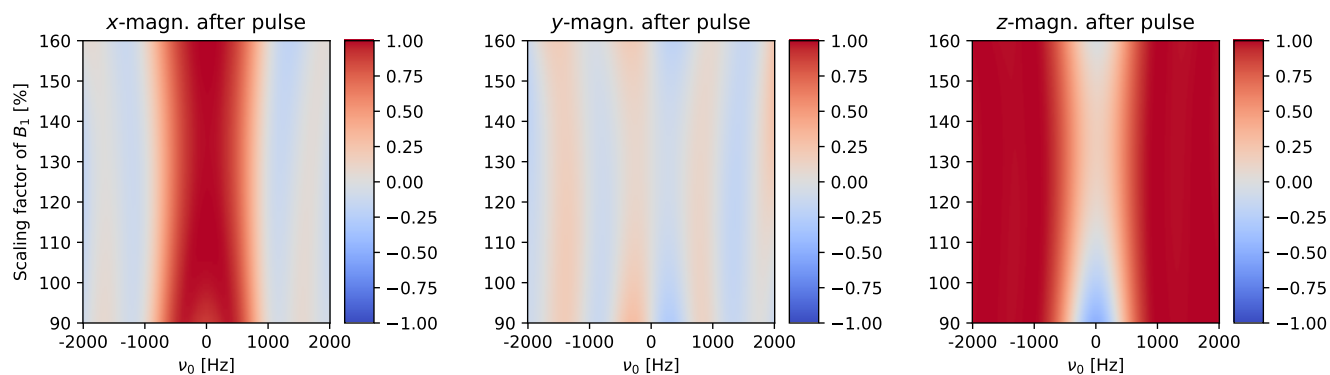

**Figure S10.** Simulated final  $x$ -,  $y$ - and  $z$ -magnetization for various Larmor-frequency offsets and  $B_1$  increases after applying QOC pulse for Larmor-frequency selective excitation.

### 2.1.2 $B_1$ -robust selective suppression within $\pm 500$ Hz in a $\pm 2000$ Hz excitation band

40 Figure S11 and S12 below show the excitation profiles of the pulses used for  $B_1$ -robust, selective suppression within  $\pm 500$  Hz in a  $\pm 2000$  Hz excitation band presented in Sec. 3.1 of the main article. The experimental results in Sec. 3.1, Fig. 4 were obtained with the pulse in Fig. S12.

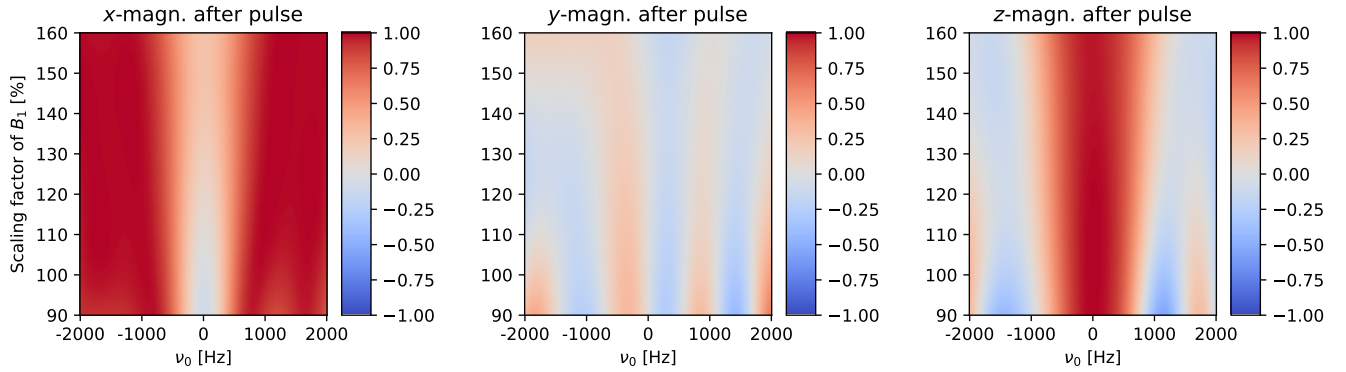

**Figure S11.** Simulated final  $x$ -,  $y$ - and  $z$ -magnetization for various Larmor-frequency offsets and  $B_1$  increases after applying a 1 ms QOC pulse for Larmor-frequency selective suppression.

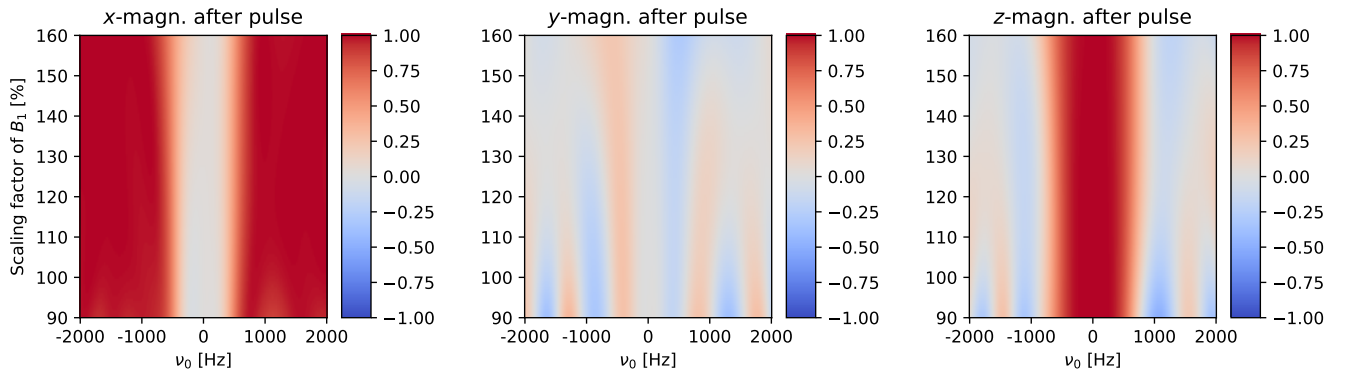

**Figure S12.** Simulated final  $x$ -,  $y$ - and  $z$ -magnetization for various Larmor-frequency offsets and  $B_1$  increases after applying a 2 ms QOC pulse for Larmor-frequency selective suppression.

## 2.2 Nutation-frequency selective pulses

The following Figures S13 to S18 show the excitation profiles of the pulses used for Larmor-frequency-robust, selective excitation for various artificial nutation frequency increases presented in Sec. 3.2 (Fig. 6) of the main article.

### 2.2.1 Larmor frequency-robust selective excitation for 0 % artificial nutation frequency increase

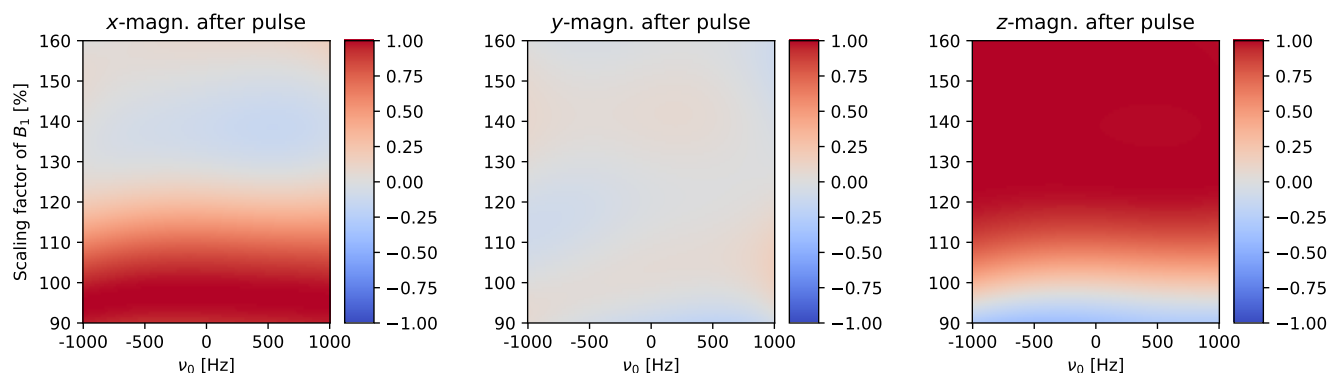

**Figure S13.** Simulated final  $x$ -,  $y$ - and  $z$ -magnetization for various Larmor-frequency offsets and  $B_1$  increases after applying QOC pulse for nutation-frequency selective excitation for no  $B_1$  increase.

### 2.2.2 Larmor frequency-robust selective excitation for 20 % artificial nutation frequency increase

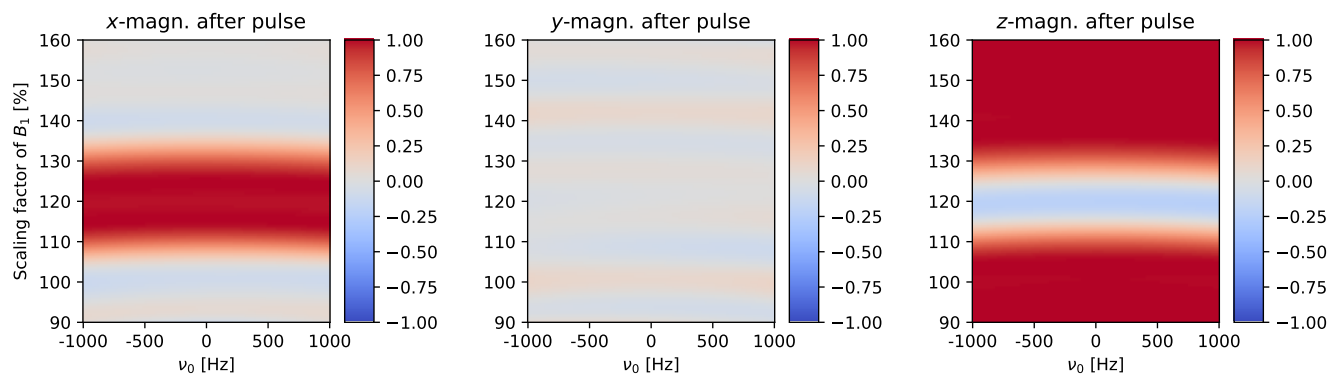

**Figure S14.** Simulated final  $x$ -,  $y$ - and  $z$ -magnetization for various Larmor-frequency offsets and  $B_1$  increases after applying QOC pulse for nutation-frequency selective excitation for 20 %  $B_1$  increase.

### 2.2.3 Larmor frequency-robust selective excitation for 25 % artificial nutation frequency increase

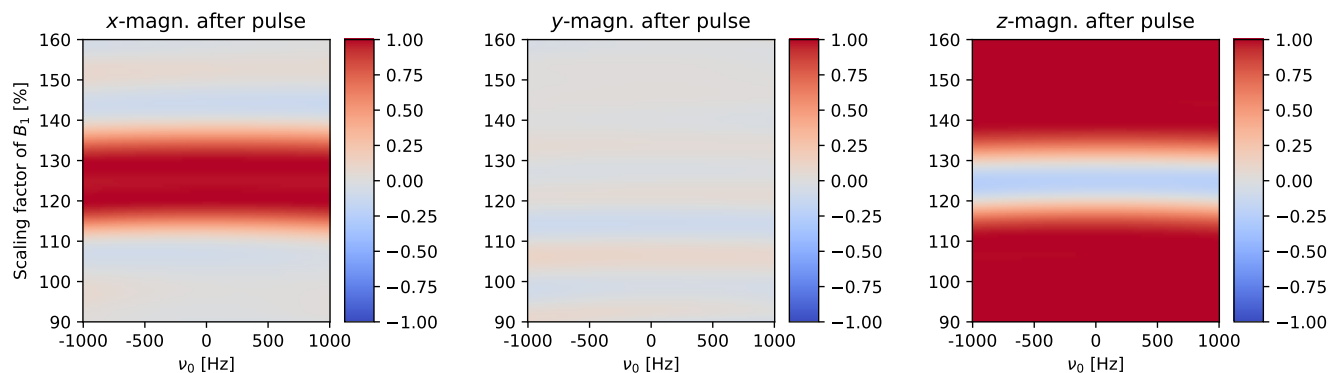

**Figure S15.** Simulated final  $x$ -,  $y$ - and  $z$ -magnetization for various Larmor-frequency offsets and  $B_1$  increases after applying QOC pulse for nutation-frequency selective excitation for 25 %  $B_1$  increase.

### 2.2.4 Larmor frequency-robust selective excitation for 30 % artificial nutation frequency increase

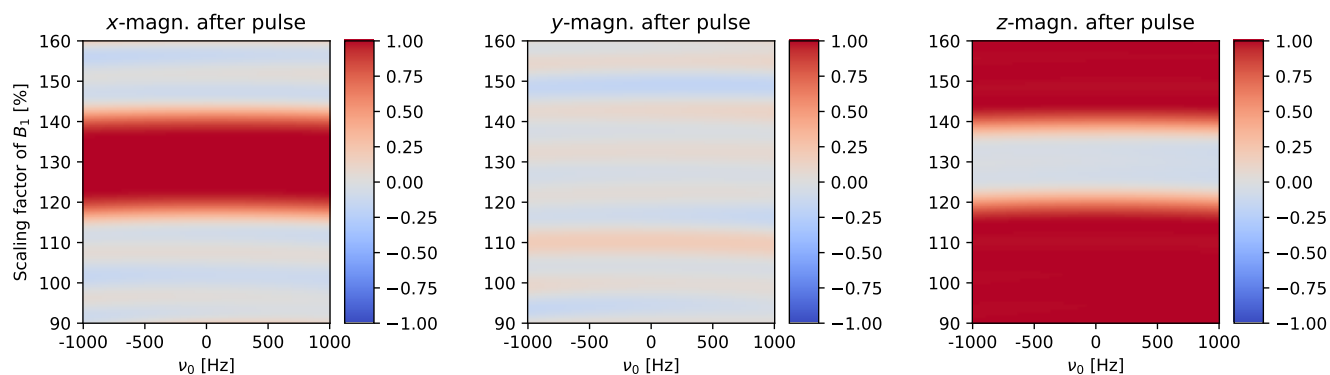

**Figure S16.** Simulated final  $x$ -,  $y$ - and  $z$ -magnetization for various Larmor-frequency offsets and  $B_1$  increases after applying QOC pulse for nutation-frequency selective excitation for 30 %  $B_1$  increase.

## 50 2.2.5 Larmor frequency-robust selective excitation for 40 % artificial nutation frequency increase

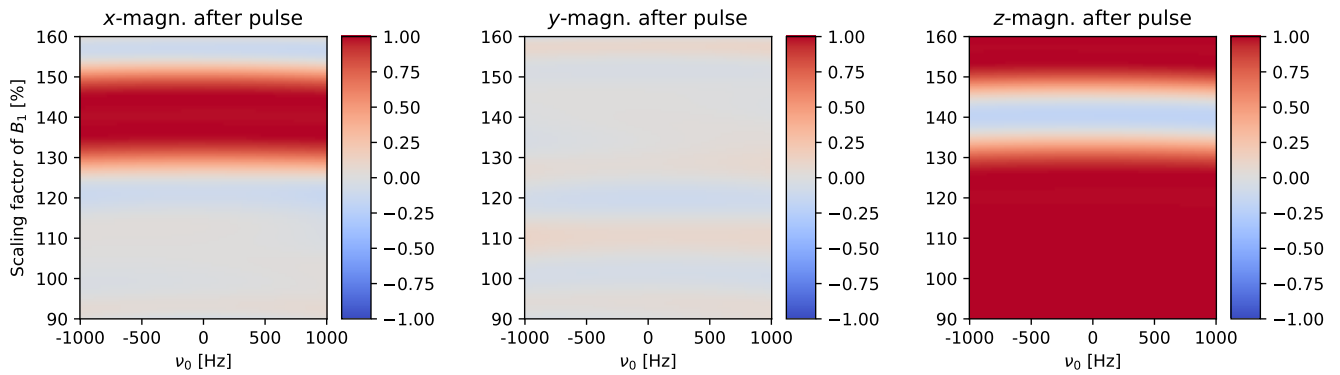

**Figure S17.** Simulated final  $x$ -,  $y$ - and  $z$ -magnetization for various Larmor-frequency offsets and  $B_1$  increases after applying QOC pulse for nutation-frequency selective excitation for 40 %  $B_1$  increase.

## 2.2.6 Larmor frequency-robust selective excitation for 80 % artificial nutation frequency increase

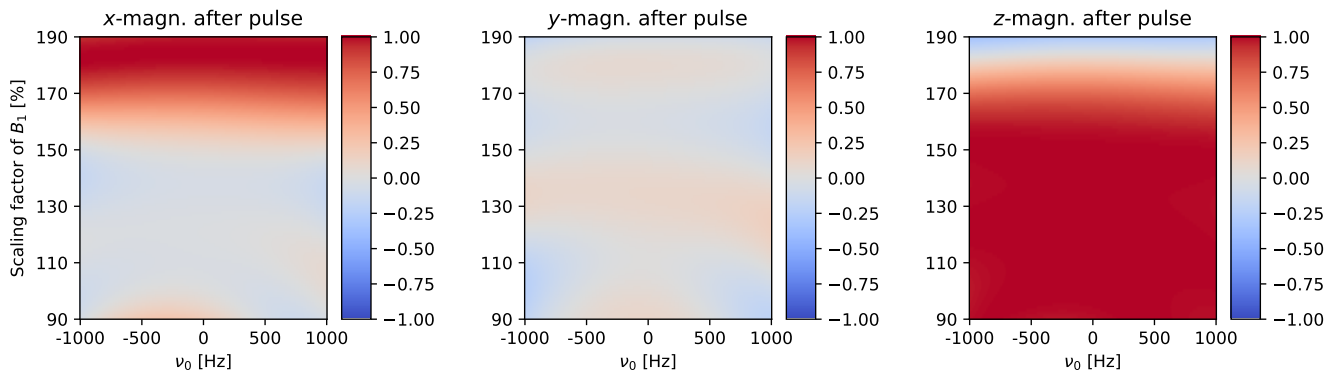

**Figure S18.** Simulated final  $x$ -,  $y$ - and  $z$ -magnetization for various Larmor-frequency offsets and  $B_1$  increases after applying QOC pulse for nutation-frequency selective excitation for 80 %  $B_1$  increase.

### 3 Experimental Setup

#### 3.1 Setup in FEM simulation

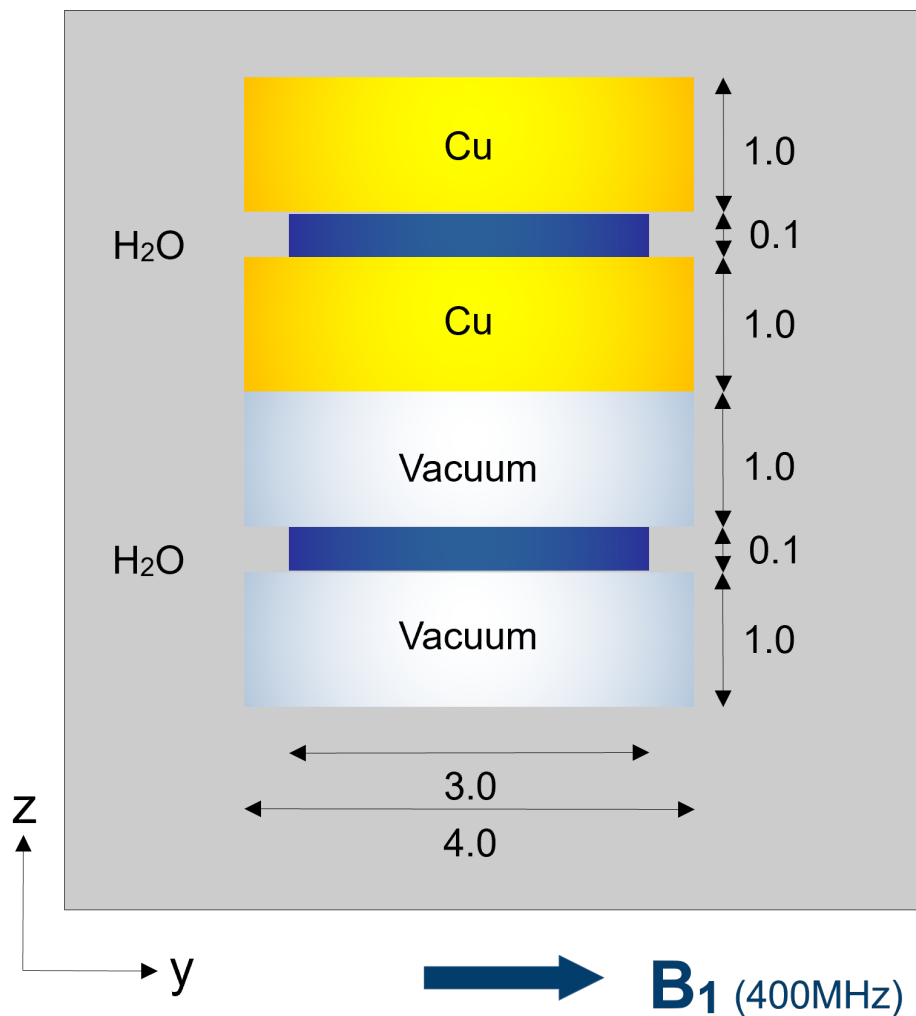

**Figure S19.** Cell parameters of the model setup in the FEM simulation. The volume between the polymer double coin was introduced as if in-between two cylindrical volumes of vacuum which have a conductivity of zero. Water was adopted as the corresponding liquid in both cavities, as the liquid composition does not affect  $\Gamma_{B_1}$ . The independence was verified by also simulating with *n*-dodecane as corresponding liquid for both cavities or only for the copper cavity.

## 4 Supporting measurements

### 55 4.1 Nutation experiments

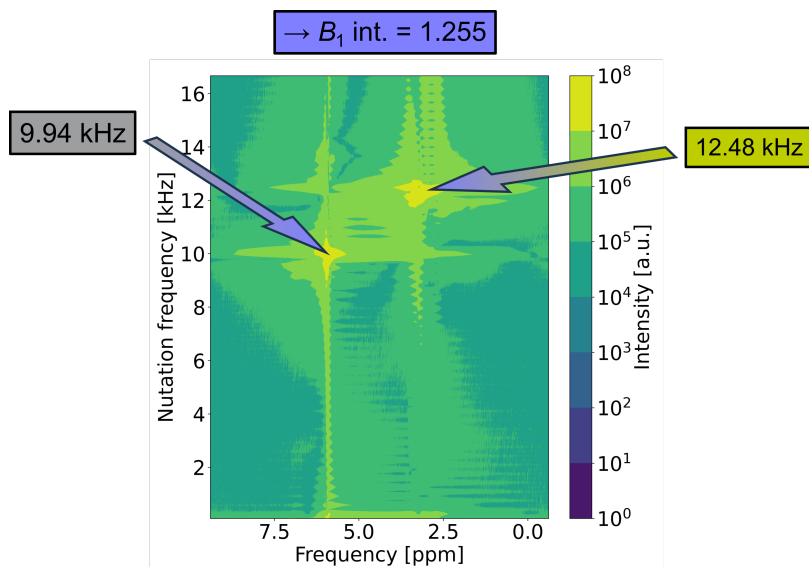

**Figure S20.**  $^1\text{H}$  NMR 2D spectrum of the model setup, describing the intensity distribution of nutation frequencies in dependence of their respective Larmor frequency. The experimentally determined nutation frequency of  $\text{H}_2\text{O}$  is denoted in the grey box while the nutation frequency of *n*-dodecane is denoted in the bright green box. A color gradient from dark blue to bright green is used to illustrate the range from low to high signal intensities.

## 4.2 $B_1$ -selective QOC pulse performance

### 4.2.1 $B_1$ -selective QOC pulse performance dependence on the liquid composition

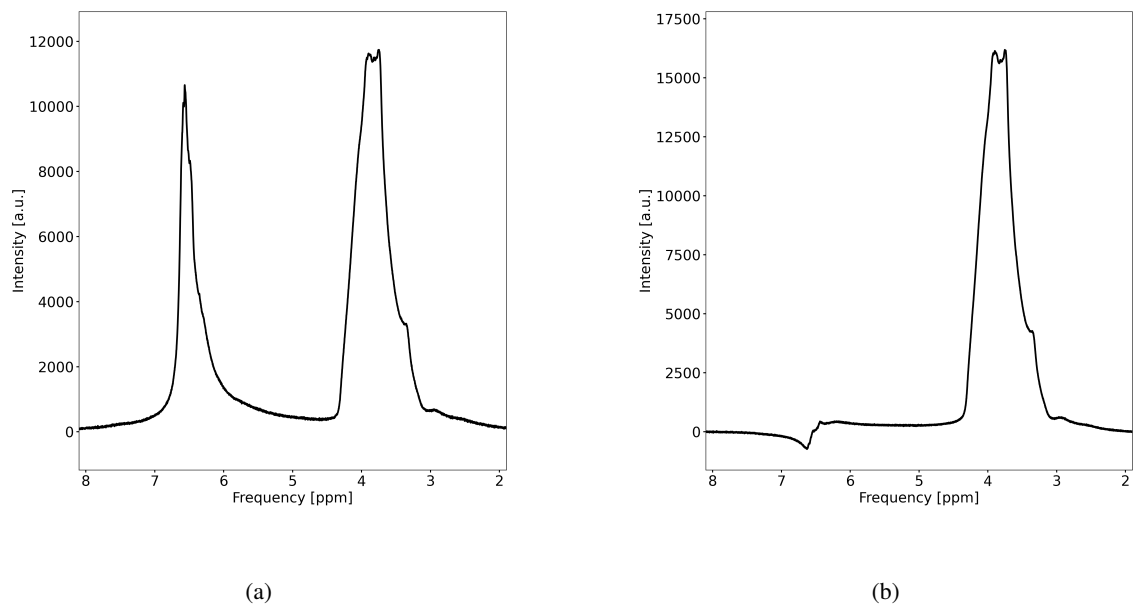

**Figure S21.** Comparison of the  $^1\text{H}$  NMR spectrum of the model setup for a  $90^\circ$  hard pulse (a) to a QOC pulse optimized for  $\Gamma_{B_1} = 1.2$  (b). Hereby, the resonance at approx. 3.8 ppm is assigned to *n*-dodecane inside the copper cavity while the signal at approx. 6.5 ppm is assigned to  $\text{H}_2\text{O}$  in the PEEK cavity.

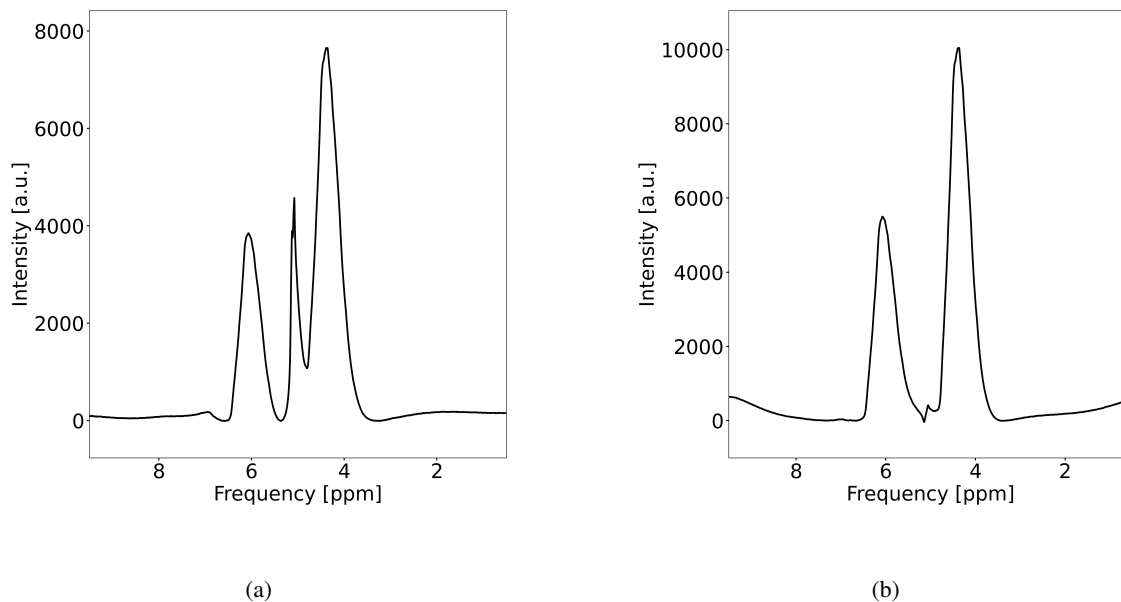

**Figure S22.** Comparison of the <sup>1</sup>H NMR spectrum of the model setup for a 90° hard pulse (a) to a QOC pulse optimized for  $\Gamma_{B_1} = 1.2$  (b). Hereby, the resonances at approx. 4.2 and 6 ppm are assigned to dimethylsulfoxide inside the copper cavity while the signal at approx. 5 ppm is assigned to H<sub>2</sub>O in the PEEK cavity. The H<sub>2</sub>O resonance is as effectively suppressed as in SI Fig. S21.

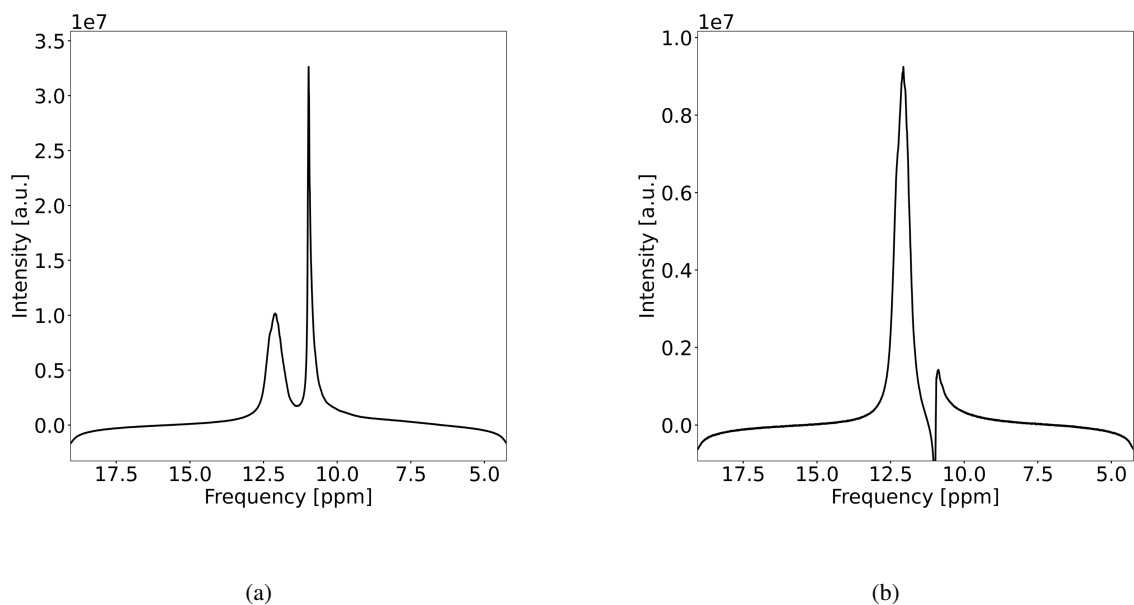

**Figure S23.** Comparison of the <sup>1</sup>H NMR spectrum of the model setup for a 90° hard pulse (a) to a QOC pulse optimized for  $\Gamma_{B_1} = 1.2$  (b). Hereby, the resonance at approx. 10.5 ppm is assigned to H<sub>2</sub>O inside the copper cavity while the signal at approx. 12 ppm is assigned to H<sub>2</sub>O in the PEEK cavity. The H<sub>2</sub>O resonance in-between PEEK is as effectively suppressed as in SI Fig. S21.

#### 4.2.2 $B_1$ -selective QOC pulse performance dependence on receiver gain

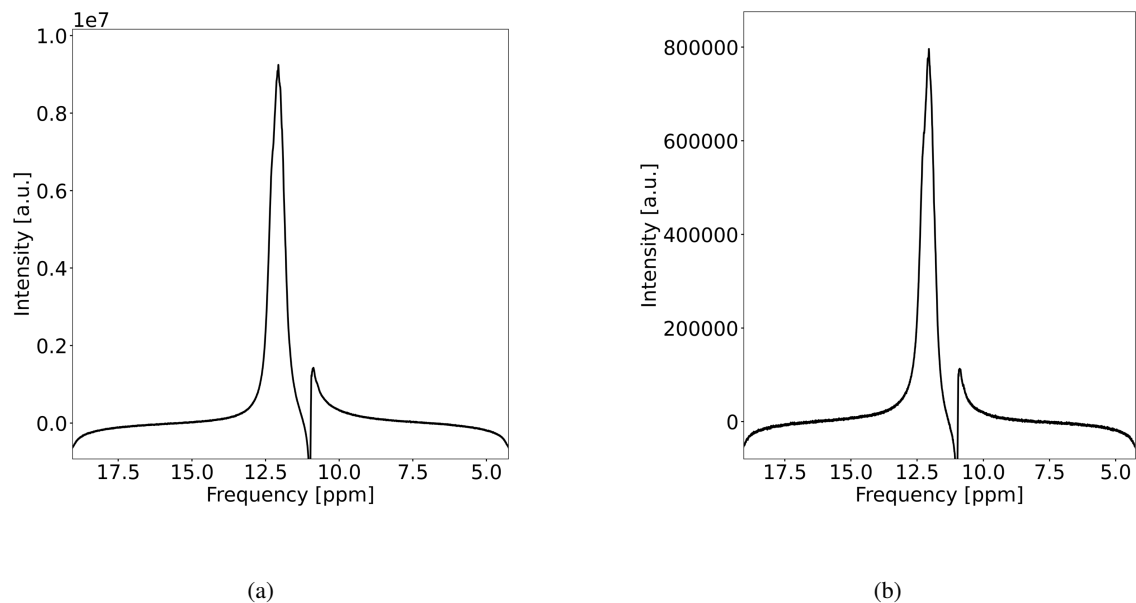

**Figure S24.** Comparison of the  $^1\text{H}$  NMR spectrum of the model setup for a QOC pulse optimized for  $\Gamma_{B_1} = 1.2$  with a receiver gain of 1 (a) to a receiver gain of 36 (b). Hereby, the resonance at approx. 10.5 ppm is assigned to  $\text{H}_2\text{O}$  inside the copper cavity while the signal at approx. 12 ppm is assigned to  $\text{H}_2\text{O}$  in the PEEK cavity. The  $\text{H}_2\text{O}$  resonance in-between PEEK is effectively suppressed for both receiver gains.

### 4.2.3 $B_1$ -selective QOC pulse performance dependence on shim

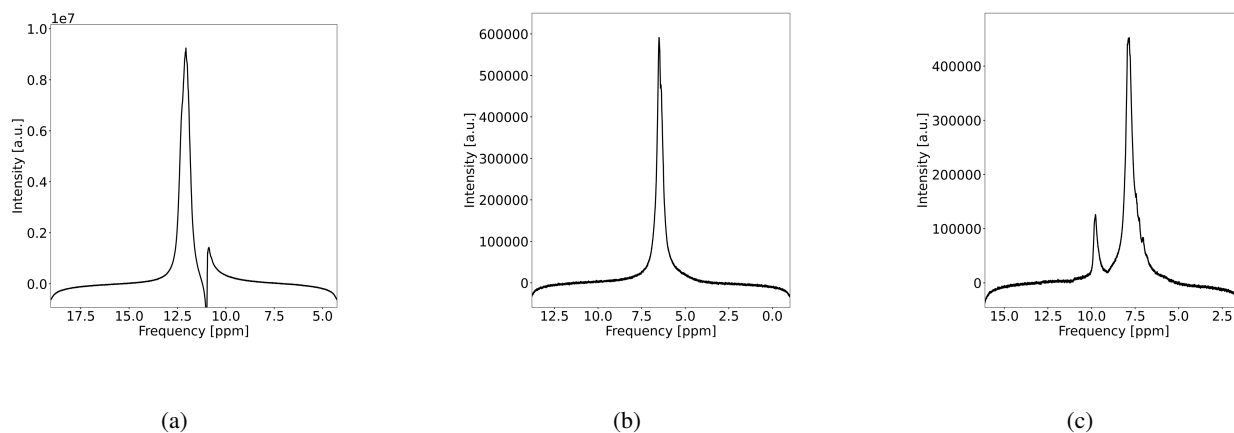

**Figure S25.** Comparison of the  $^1\text{H}$  NMR spectrum of the model setup for a QOC pulse optimized for  $\Gamma_{B_1} = 1.2$  with all shims set to zero (a), shimming until both resonances coalesce to a single resonance (b) and shimming to switch the frequencies of both resonances (c). Hereby, the resonance in (a) at approx. 10.5 ppm is assigned to  $\text{H}_2\text{O}$  inside the copper cavity while the signal at approx. 12 ppm is assigned to  $\text{H}_2\text{O}$  in the PEEK cavity. The resonance in (c) at approx. 7.5 ppm is assigned to  $\text{H}_2\text{O}$  inside the copper cavity while the signal at approx. 9.5 ppm is assigned to  $\text{H}_2\text{O}$  in the PEEK cavity. The  $\text{H}_2\text{O}$  resonance in-between PEEK is effectively suppressed in the case of all investigated shims.

#### 60 4.2.4 $B_1$ -selective QOC pulse performance dependence on $\Delta\nu_0$

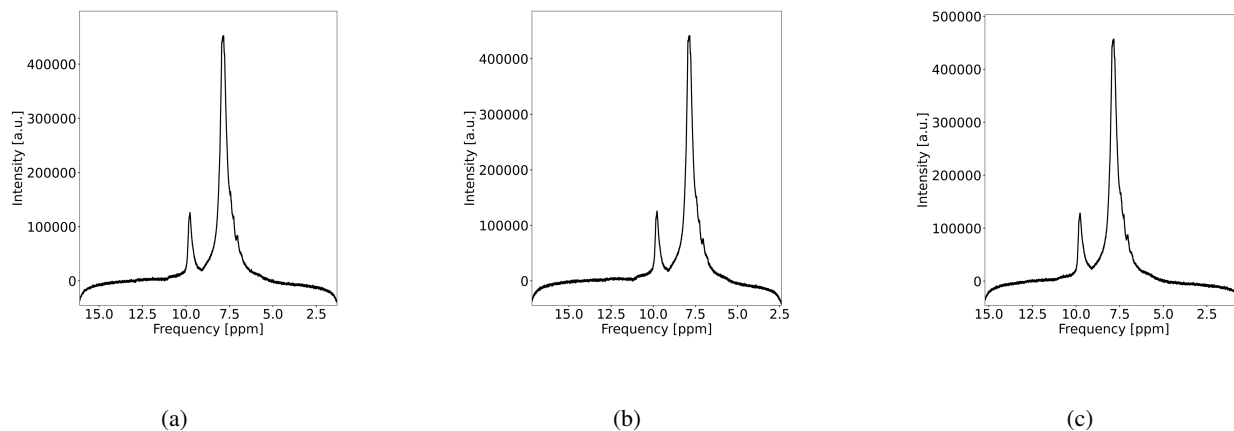

**Figure S26.** Comparison of the  $^1\text{H}$  NMR spectrum of the model setup for a QOC pulse optimized for  $\Gamma_{B_1} = 1.2$  with  $\Delta\nu_0$  given in Section 2.2 (a), when moving  $\Delta\nu_0$  downfield (b) and when moving  $\Delta\nu_0$  upfield (c). Hereby, the resonance in (a) at approx. 7.5 ppm is assigned to  $\text{H}_2\text{O}$  inside the copper cavity while the signal at approx. 9.5 ppm is assigned to  $\text{H}_2\text{O}$  in the PEEK cavity. The  $\text{H}_2\text{O}$  resonance in-between PEEK is effectively suppressed in the case of all investigated  $\Delta\nu_0$ .

### 4.3 $B_0$ -selective QOC pulses

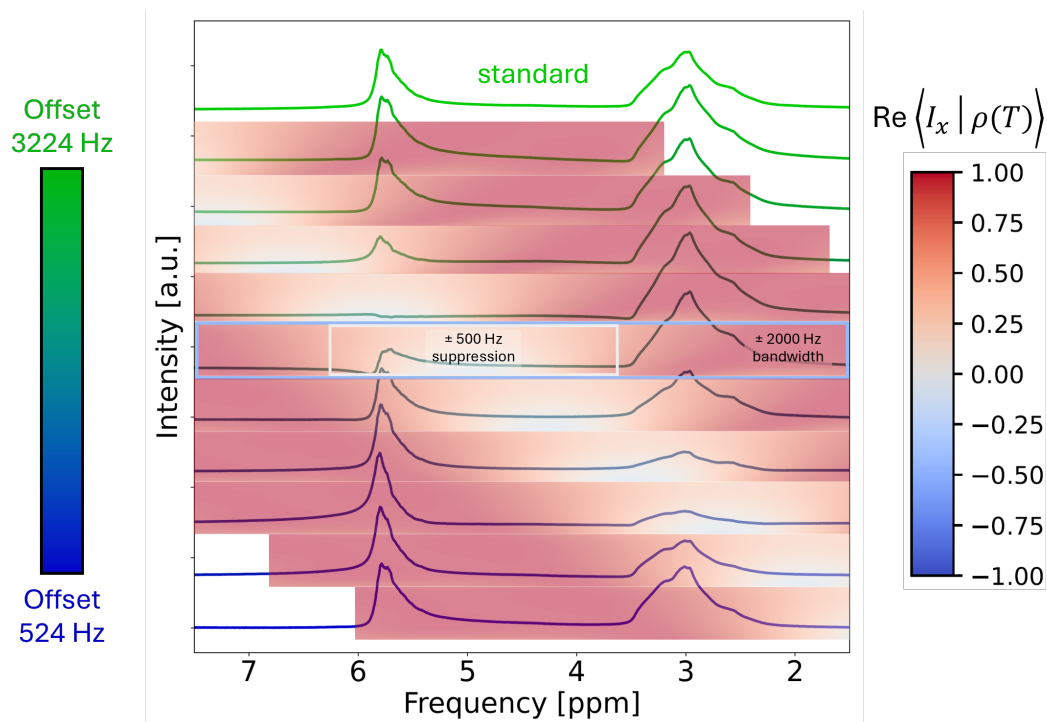

**Figure S27.**  $^1\text{H}$  spectra recorded utilizing a  $B_0$ -selective suppression pulse with a selective suppression range of 2.5 ppm ( $\pm 500$  Hz), 1 ms duration, and a total frequency range of 4000 Hz applied at different  $\Delta\nu_0$ . The top spectrum depicts the reference  $^1\text{H}$  spectrum recorded using a hard pulse. Hereby, the resonance at approx. 3 ppm is assigned to  $n$ -dodecane and the resonance at approx. 6 ppm to  $\text{H}_2\text{O}$ . The spectra recorded with QOC pulses are overlaid with colour gradients representing the theoretical  $x$ -magnetization  $\text{Re}\langle I_x | \rho(T) \rangle$  after applying the QOC pulse at each particular  $\Delta\nu_0$ . Selective suppression is achieved for the on-resonance pulse with  $\Delta\nu_0 = 2324$  Hz for  $\text{H}_2\text{O}$ . The pulse for  $n$ -dodecane is slightly off-resonance (+ 100 Hz) with  $\Delta\nu_0 = 1424$  Hz and does not achieve sufficient suppression.

## 5 Supporting data

### 5.1 Individual relative integrals of the $B_0$ -selective QOC pulses

**Table S1.** Individual relative integrals of the  $B_0$ -selective 1 ms excitation pulses compared to a corresponding  $90^\circ$  hard pulse

| $\Delta\nu_0$ [Hz] | H <sub>2</sub> O excitation [%] | <i>n</i> -dodecane excitation [%] |
|--------------------|---------------------------------|-----------------------------------|
| 2975               | 66.58 ± 0.41                    | 0.90 ± 0.26                       |
| 2775               | 95.15 ± 0.38                    | 7.56 ± 0.24                       |
| 2575               | 87.39 ± 0.36                    | 11.56 ± 0.23                      |
| 2375               | 87.45 ± 0.43                    | 4.96 ± 0.28                       |
| 2175               | 97.18 ± 0.38                    | 9.71 ± 0.24                       |
| 1975               | 95.03 ± 0.36                    | 34.30 ± 0.23                      |
| 1775               | 70.80 ± 0.37                    | 63.17 ± 0.24                      |
| 1575               | 35.81 ± 0.40                    | 95.45 ± 0.26                      |
| 1375               | 4.02 ± 0.40                     | 115.34 ± 0.26                     |
| 1175               | 13.58 ± 0.40                    | 139.11 ± 0.26                     |
| 975                | 14.40 ± 0.37                    | 77.78 ± 0.24                      |
| 775                | 8.89 ± 0.46                     | 59.63 ± 0.30                      |

**Table S2.** Individual relative integrals of the  $B_0$ -selective 1 ms suppression pulses compared to a corresponding  $90^\circ$  hard pulse. For this experiment, the baseline of the hard pulse spectrum required a comparatively strong correction, resulting in reduced integrals of the reference spectrum and thus increased relative integrals for all other spectra.

| $\Delta\nu_0$ [Hz] | H <sub>2</sub> O excitation [%] | <i>n</i> -dodecane excitation [%] |
|--------------------|---------------------------------|-----------------------------------|
| 3224               | 175.34 ± 0.99                   | 147.67 ± 0.31                     |
| 2924               | 138.48 ± 1.41                   | 134.16 ± 0.44                     |
| 2624               | 57.89 ± 0.81                    | 143.20 ± 0.25                     |
| 2324               | 7.42 ± 0.97                     | 159.24 ± 0.30                     |
| 2024               | 65.17 ± 1.07                    | 138.80 ± 0.33                     |
| 1724               | 139.83 ± 1.09                   | 88.81 ± 0.34                      |
| 1424               | 173.06 ± 1.03                   | 32.66 ± 0.32                      |
| 1124               | 167.19 ± 0.94                   | 25.24 ± 0.29                      |
| 824                | 168.55 ± 1.11                   | 68.70 ± 0.35                      |
| 524                | 213.95 ± 0.99                   | 110.54 ± 0.31                     |

**Table S3.** Individual relative integrals of the  $B_0$ -selective 2 ms suppression pulses compared to a corresponding  $90^\circ$  hard pulse

| $\Delta\nu_0$ [Hz] | H <sub>2</sub> O excitation [%] | <i>n</i> -dodecane excitation [%] |
|--------------------|---------------------------------|-----------------------------------|
| 2975               | 86.27 ± 0.46                    | 99.92 ± 0.28                      |
| 2775               | 40.62 ± 0.43                    | 113.72 ± 0.26                     |
| 2575               | 5.31 ± 0.41                     | 93.40 ± 0.25                      |
| 2375               | 1.01 ± 0.48                     | 100.00 ± 0.30                     |
| 2175               | 5.36 ± 0.45                     | 90.79 ± 0.28                      |
| 1975               | 34.54 ± 0.36                    | 80.60 ± 0.22                      |
| 1775               | 81.30 ± 0.43                    | 51.14 ± 0.26                      |
| 1575               | 102.77 ± 0.40                   | 15.44 ± 0.24                      |
| 1375               | 111.01 ± 0.42                   | 1.29 ± 0.26                       |
| 1175               | 119.03 ± 0.53                   | 1.14 ± 0.33                       |
| 975                | 103.97 ± 0.45                   | 19.33 ± 0.28                      |
| 775                | 99.13 ± 0.48                    | 51.40 ± 0.30                      |
